# Supplementary material
Source: publisher site journal article supplement (https://neobiota.pensoft.net/article/30392/download/suppl/34/)
Supplement: Supplementary file 1

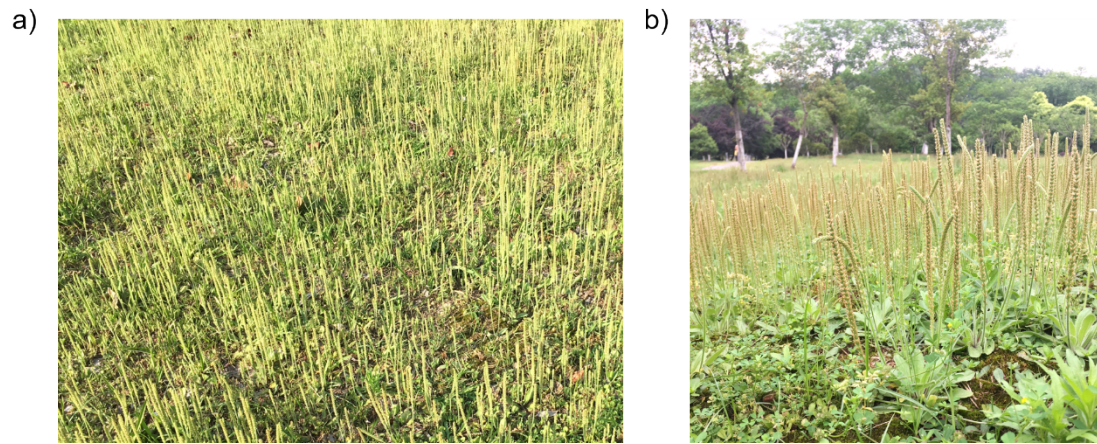

Fig. S3 Photos of introduced population of *P. virginica* in Jiangsu, China: a) top view and b) eye-level view. Plants with infructescences in the photos are all *P. virginica* individuals.
